# Supplementary material for: Relationship between Nitrogen Dynamics and Key Microbial Nitrogen-Cycling Genes in an Intensive Freshwater Aquaculture Pond
Source: MDPI journal article supplement (doi:10.3390/microorganisms12020266), 2024-01-26
Supplement: s1 [file s1]

**Table S1.** The Monte Carlo permutation test within the redundancy analysis of the relationships between environmental variables and gene abundances in the water column

| Name                            | Explains % | Contribution % | pseudo-F | P     |
|---------------------------------|------------|----------------|----------|-------|
| SPM flux                        | 21.2       | 28.6           | 14       | 0.002 |
| TN                              | 11.9       | 16             | 9        | 0.002 |
| SD                              | 9.5        | 12.8           | 8.3      | 0.002 |
| NO <sub>3</sub> <sup>-</sup> -N | 4.7        | 6.4            | 4.4      | 0.008 |
| T                               | 4          | 5.5            | 4        | 0.004 |
| TP                              | 2.7        | 3.6            | 2.7      | 0.024 |
| NO <sub>2</sub> <sup>-</sup> -N | 2.8        | 3.8            | 3        | 0.028 |
| NH <sub>4</sub> <sup>+</sup> -N | 3.3        | 4.5            | 3.8      | 0.014 |
| DO                              | 2.1        | 2.8            | 2.5      | 0.058 |
| Chl-a                           | 2.9        | 3.9            | 3.5      | 0.012 |
| PO <sub>4</sub> <sup>-</sup>    | 1.9        | 2.5            | 2.4      | 0.066 |
| TN <sub>SPM</sub> flux          | 2.8        | 3.7            | 3.7      | 0.018 |
| TP <sub>SPM</sub> flux          | 2.3        | 3.1            | 3.3      | 0.028 |
| pH                              | 2          | 2.7            | 3        | 0.038 |

**Table S2.** The Monte Carlo permutation test within the redundancy analysis of the relationships between environmental variables and gene abundances in the sediment

| Name                                 | Explains % | Contribution % | pseudo-F | P     |
|--------------------------------------|------------|----------------|----------|-------|
| NH <sub>4</sub> <sup>+</sup> -N flux | 20.8       | 27.8           | 13.7     | 0.002 |
| NO <sub>3</sub> <sup>-</sup> -N flux | 12         | 16             | 9.1      | 0.002 |
| TN <sub>SPM</sub> flux               | 9.3        | 12.4           | 8        | 0.004 |
| O-NO <sub>3</sub> <sup>-</sup> -N    | 10.3       | 13.8           | 10.6     | 0.002 |
| TN <sub>s</sub>                      | 3.6        | 4.8            | 4        | 0.004 |
| NO <sub>2</sub> <sup>-</sup> -N flux | 3.4        | 4.6            | 4        | 0.01  |
| TP <sub>SPM</sub> flux               | 3.9        | 5.2            | 4.9      | 0.004 |
| O-NO <sub>2</sub> <sup>-</sup> -N    | 2.8        | 3.8            | 3.8      | 0.022 |
| TP <sub>s</sub>                      | 2.8        | 3.7            | 3.9      | 0.014 |
| O-NH <sub>4</sub> <sup>+</sup> -N    | 2          | 2.6            | 2.9      | 0.022 |
| O-pH                                 | 1.9        | 2.5            | 2.9      | 0.038 |
| SPM flux                             | 1          | 1.3            | 1.5      | 0.168 |
| O-T                                  | 0.6        | 0.8            | 0.9      | 0.428 |
| O-DO                                 | 0.6        | 0.8            | 0.9      | 0.408 |
